# Supplementary material for: The cost-effectiveness of neonatal versus prenatal screening for congenital toxoplasmosis
Source: PubMed Central journal article supplement (PMC6750576; doi:10.1371/journal.pone.0221709), 2019-09-18
Supplement: pone.0221709.s004.pdf [file pone.0221709.s004.pdf]

## S4-Lyon Cohort

### Organization for case identification and data collection

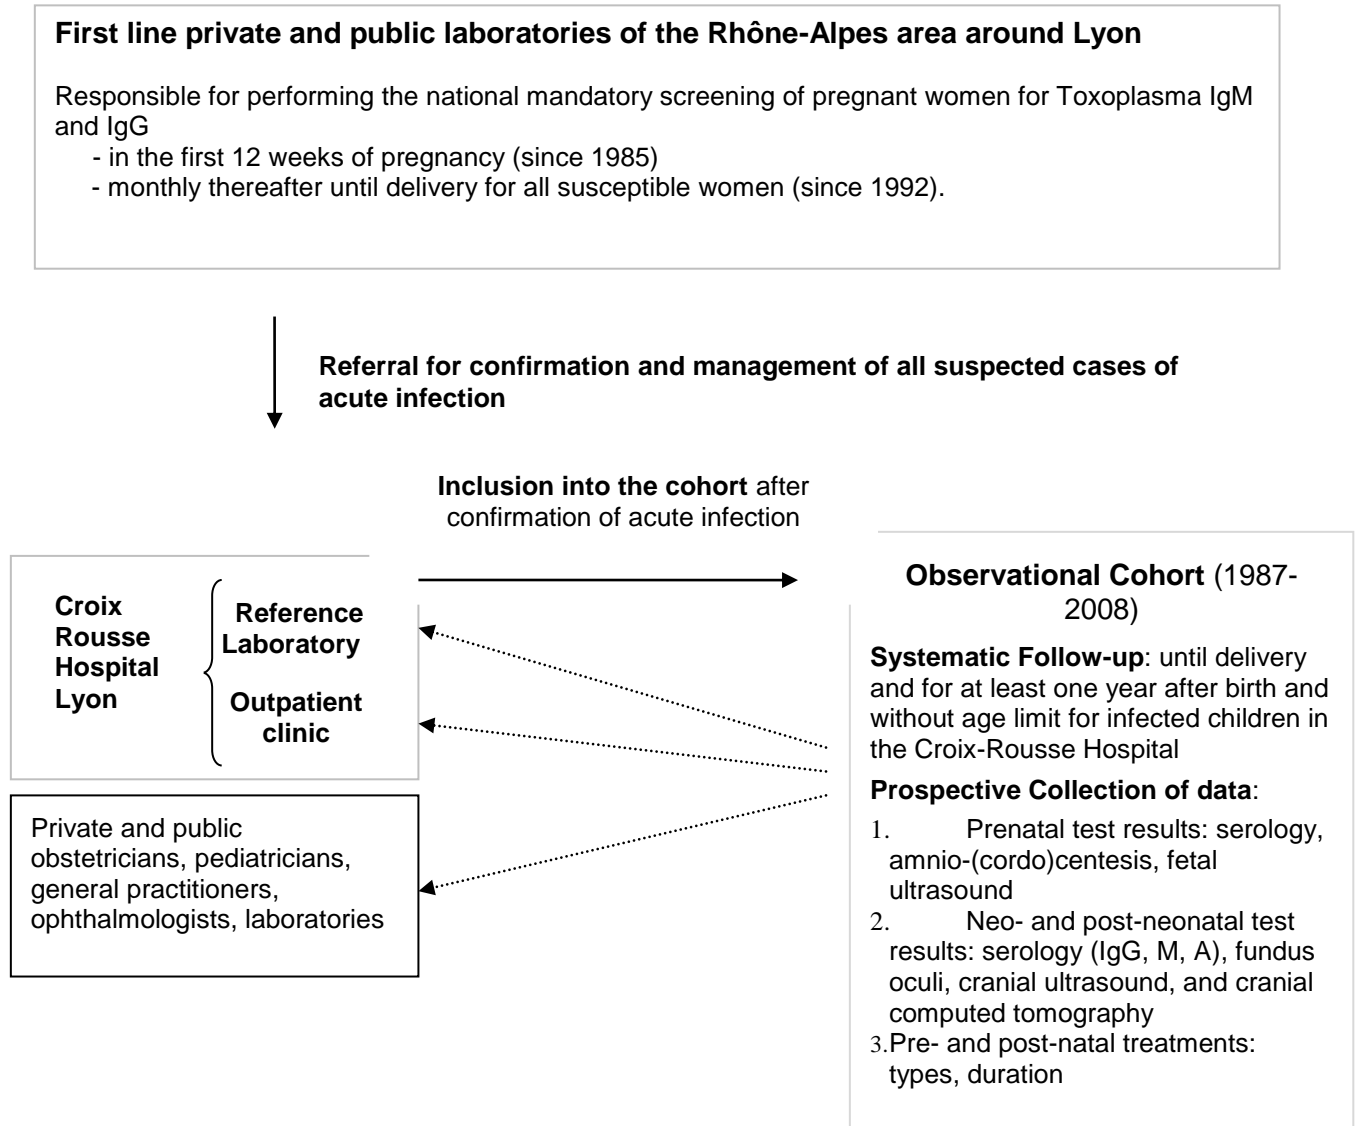

Source : Wallon M, Peyron F, Cornu C, Vinault S, Abrahamowicz M, Bonithon-Kopp C, et al. Congenital toxoplasma infection: monthly prenatal screening decreases transmission rate and improves clinical outcome at age 3 years. Clin Infect Dis 2013;56(9):1223-31.

**Flowchart of the final mother and child populations in the study (Lyon cohort, 1987–2008).**

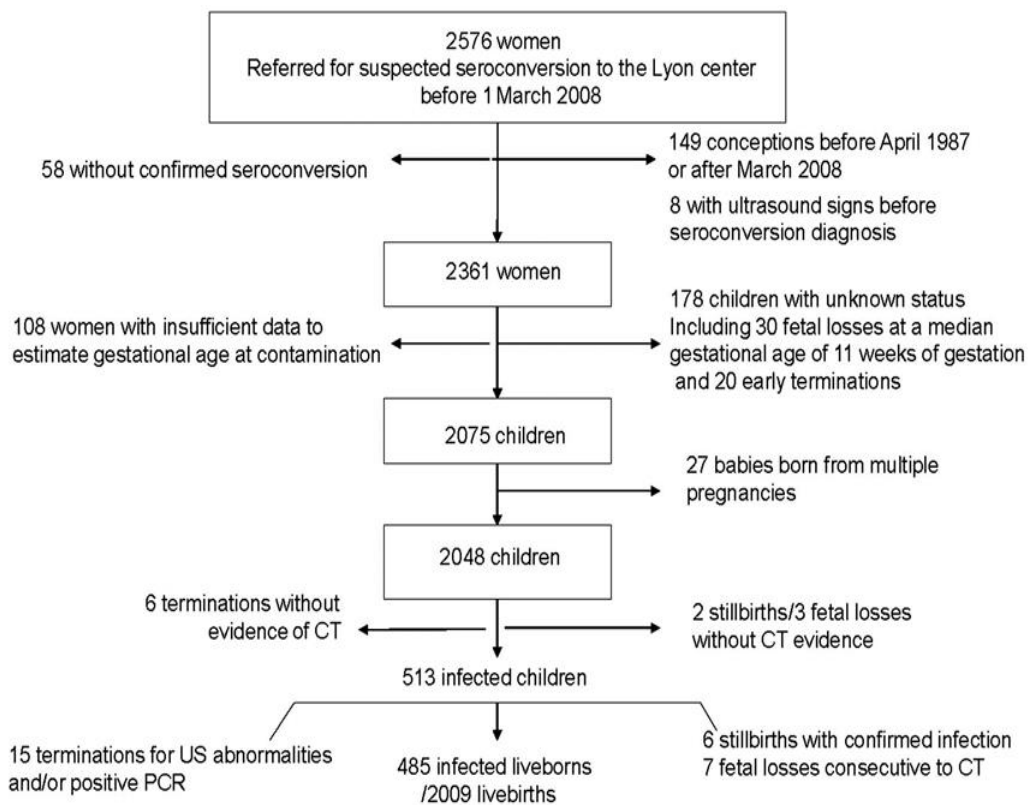

**M. Wallon et al. Clin Infect Dis. 2013;56:1223-1231**

© The Author 2013. Published by Oxford University Press on behalf of the Infectious Diseases Society of America. All rights reserved. For Permissions, please e-mail: journals.permissions@oup.com

Clinical Infectious Diseases

Source : Wallon M, Peyron F, Cornu C, Vinault S, Abrahamowicz M, Kopp CB, et al. Congenital toxoplasma infection: monthly prenatal screening decreases transmission rate and improves clinical outcome at age 3 years. Clin Infect Dis 2013;56(9):1223-31.
